# Supplementary material for: Genistein enhances NAD+ biosynthesis by binding to prohibitin 1 and upregulating nicotinamide phosphoribosyltransferase (NAMPT) in adipocytes
Source: Research Square preprint supplement (doi:10.21203/rs.3.rs-2937286/v1), 2023-05-17
Supplement: Supplementary file 1 [file b8e7981aaba9a91a1dff4602.docx]

**Supplemental Materials**

**Genistein enhances NAD+ biosynthesis by binding to prohibitin 1 and upregulating nicotinamide phosphoribosyltransferase (NAMPT) in adipocytes**

Shun Watanabea, Riki Haruyamab, Koji Umezawac, Ikuo Tomiokaa,b, Soichiro Nakamurab, Shigeru Katayamac, Takakazu Mitania,b*

aGraduate School of Science and Technology, Shinshu University, 8304 Minami-minowa, Kamiina, Nagano, 3994598, Japan.

bDepartment of Agricultural and Life Sciences, Faculty of Agriculture, Shinshu University, 8304 Minami-minowa, Kamiina, Nagano, 3994598, Japan.

cDepartment of Biomolecular Innovation, Institute for Biomedical Sciences, Interdisciplinary Cluster for Cutting Edge Research, Shinshu University, Kamiina, 8304 Minami-minowa, Kamiina, Nagano, Japan.

***Corresponding author** ([mitani@shinshu-u.ac.jp](mailto:mitani@shinshu-u.ac.jp))

**Suppl. Fig. S1 Effect of genistein on intracellular NAD+ and NAMPT expression levels.** qPCR analysis of NAD+ biosynthesis associated genes in 3T3-L1 adipocytes after induction of differentiation in the presence (green bars) or absence (blue bars) of genistein (Gen; 10 μM) for 7 days. Data are representative of triplicate independent experiments presented as the mean ± s.d. (n = 3).

**
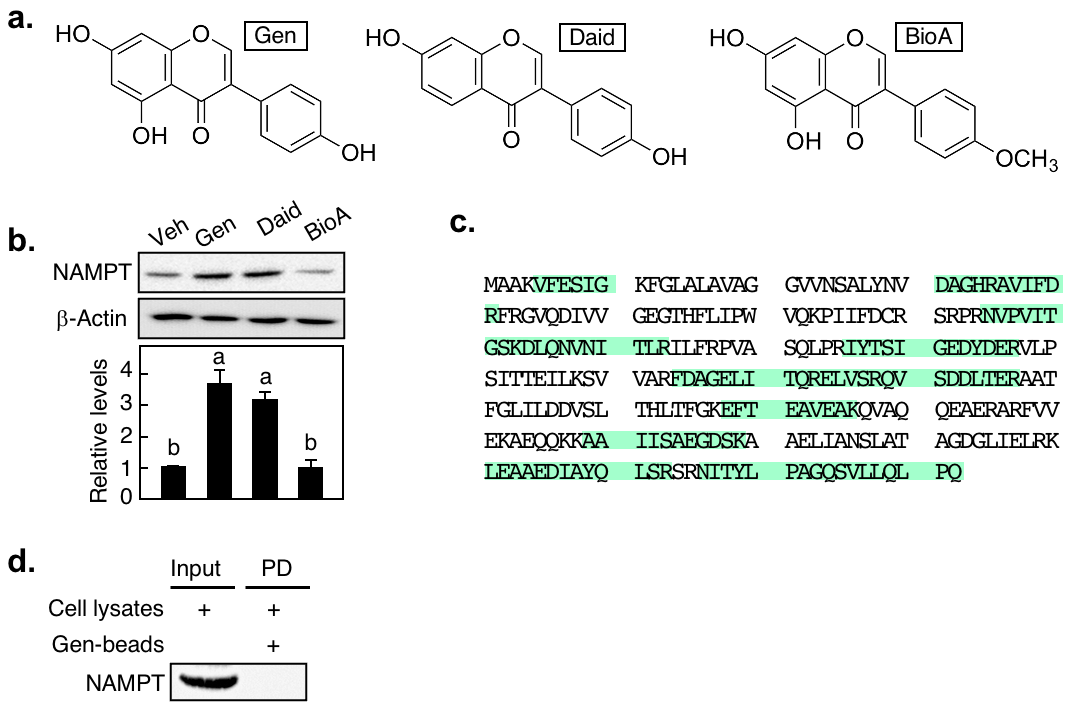
Suppl. Fig. S2 Identification of target protein for genistein-mediated regulation of NAMPT expression. a** Chemical structure of isoflavones. **b** Western blotting of NAMPT in 3T3-L1 adipocytes after induction of differentiation with 10 μM isoflavones (genistein; Gen, daidzein; Daid, Biochanin A; BioA) for 7 days. **c** Amino acid sequences of PHB1. Obtained peptide fragments by nanoLC Q-TOF/MS and ProteinLynx Global server software are shown in green sheet. **d** Pulldown assay between Gen-bead and NAMPT. 3T3-L1 adipocyte lysates were incubated with Gen-bead, followed by western blotting with anti-NAMPT antibodies. Data are representative of triplicate independent experiments presented as the mean ± s.d. (n = 3). Different letters indicate statistically significant differences (*p* < 0.05).

**Suppl. Fig. S3 Effect of genistein and PHB1 on C/EBPb-stimulated promoter activity of Nampt gene. a** qPCR analysis of *Cebpb* in 3T3-L1 adipocytes after induction of differentiation in the presence (green bars) or absence (blue bars) of genistein (Gen; 10 μM). **b** Nampt promoter activity in 3T3-L1 adipocytes transiently transfected with pGL4-Nampt-Luc vector, and C/EBPβ and PHB1ΔNTD expression vectors, followed by incubation with Gen. Data are representative of triplicate independent experiments presented as the mean ± s.d. (n = 3). Statistically significant differences (*p* < 0.05) are indicated using different letters—a common letter between the groups indicated that the difference is not statistically significant.

**Suppl. Fig. S4 Association of genistein-increased C/EBPβ protein levels and ERK signaling. a** Phosphorylation levels of ERK in PHB1-specific siRNA (siPHB1)-treated ASCs treated with genistein (Gen; 10 μM). **b** Western blotting of C/EBPβ, p-ERK in ASCs treated with Gen and ERK inhibitor PD98059 (20 µM). All data shown are each representative of triplicate independent experiments.

**
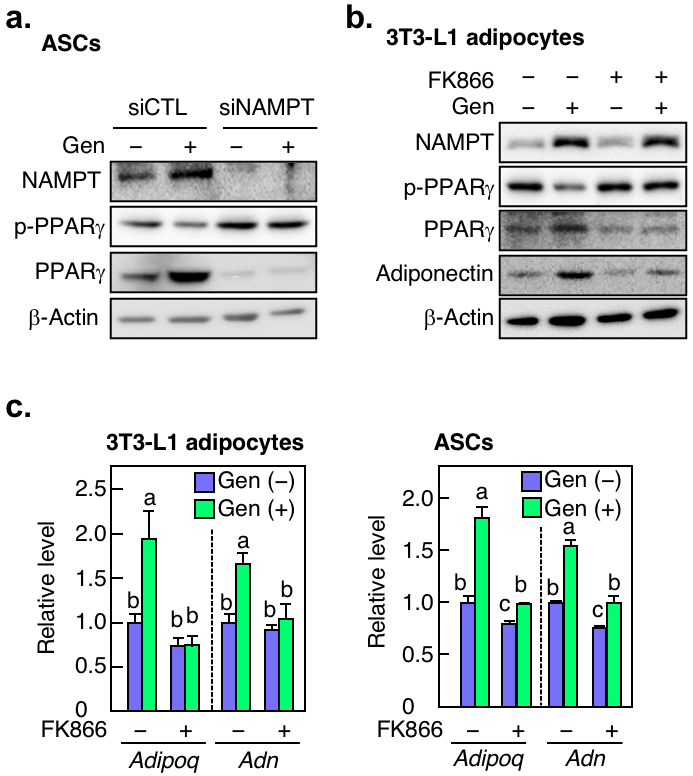
Suppl. Fig. S5 Effect of genistein on phosphorylation of PPARγ through the upregulation of NAMPT. a** Western blotting in NAMPT-knocked down ASCs. The cells were transfected with siRNA for control (siCTL) or NAMPT specific (siNAMPT), followed by differentiation with genistein (Gen; 10 μM) for 7 days. **b** Protein expression of p-PPARγ, PPARg and adiponectin in 3T3-L1 adipocytes. The cells were induced into adipocyte differentiation with Gen and/or FK866 (10 nM) for 7 days. **c** qPCR analysis in 3T3-L1 adipocytes (*left panel*) or ASCs (*right panel*) treated with FK866 in the presence (green bars) or absence (blue bars) of Gen for 7 days. Data are representative of triplicate independent experiments presented as the mean ± s.d. (n = 3). Statistically significant differences (*p* < 0.05) are indicated using different letters—a common letter between the groups indicated that the difference is not statistically significant.

**
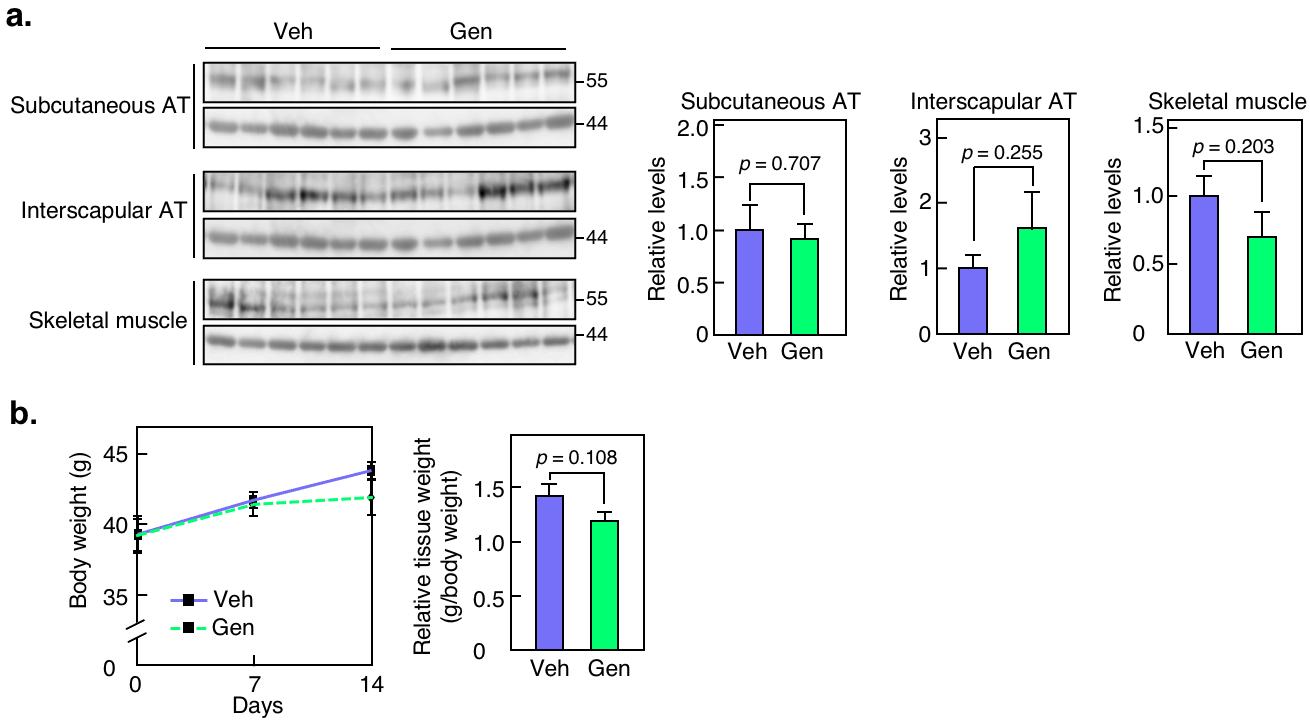
Suppl. Fig. S6 Effect of genistein administration on NAD+ levels and NAMPT expression in adipose tissues. a** Western blotting of NAMPT in adipose tissues (AT) and skeletal muscle from mice following two weeks treatment with either vehicle (Veh) or genistein (Gen) (*left panels*). The ratio of each band was normalized to that of β-actin (*right panels*). **b** Body and visceral adipose tissue weight in Gen administered mice. In **a** and **b**, blue bars are Veh and green bars are Gen. Error bars represent the mean ± s.e.m. (n = 6), and all data did not show statistically significant differences between the Veh and Gen groups (*p* > 0.05).
